# Supplementary material
Source: PubMed Central journal article supplement (PMC5624387)
Supplement: JCB688704_supplementary_material.pdf [file JCB688704_supplementary_material.pdf]

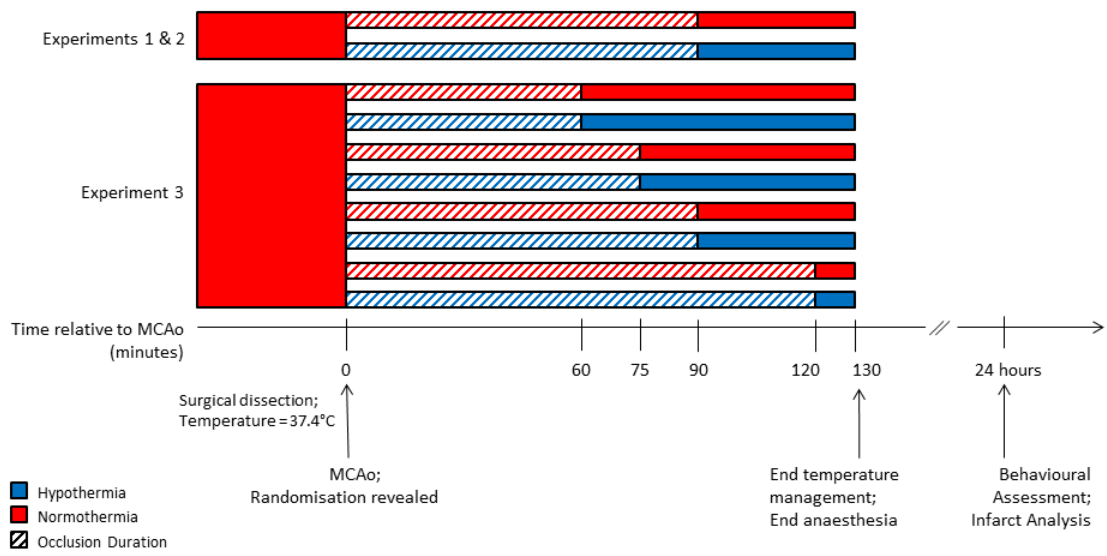

**Supplementary Figure 1: Experimental design**

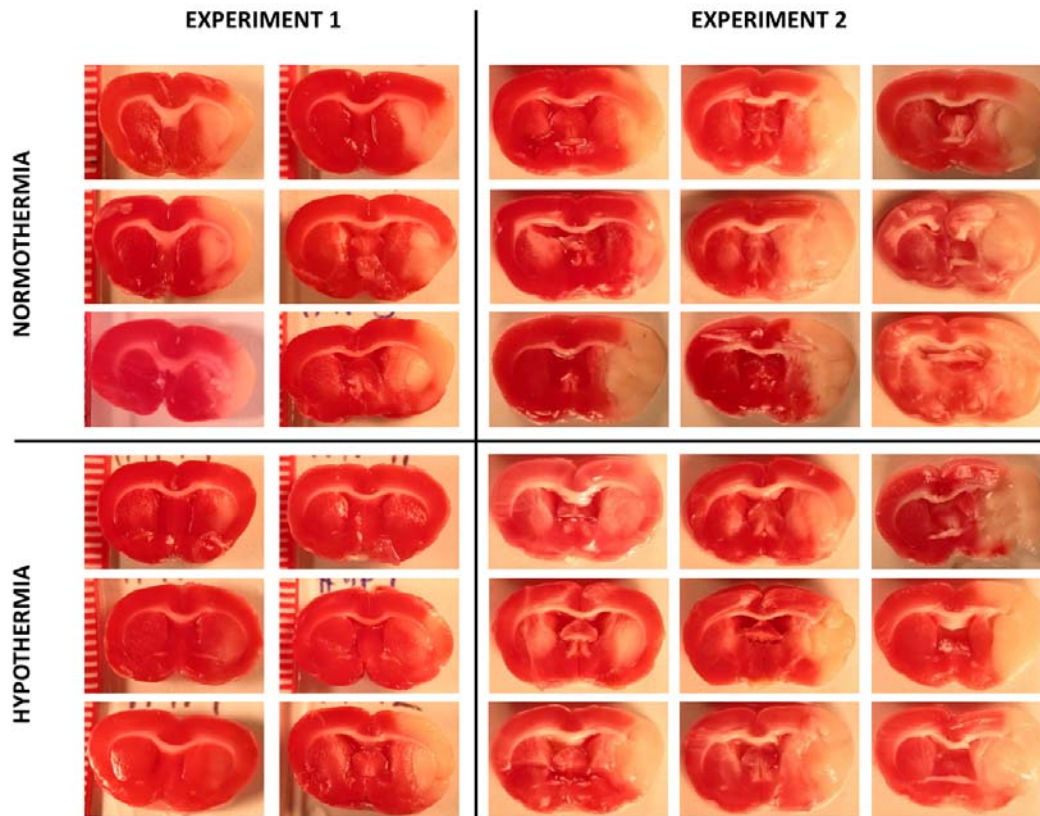

**Supplementary Figure 2:** Comparison of infarcts across Experiments 1 and 2. Representative TTC images from individual animals taken through the centre of the infarct (approximately 1mm relative to Bregma). Infarcts from Experiment 2 encompassed a greater portion of the cortex in both normothermia and hypothermia groups.
